1                   **Novel method to determine diagnosis-defining refraction points**

2                   Tsuneto Yamauchi<sup>1, #</sup>, Mitsuhiro Ohshima<sup>2</sup>, Yoko Yamaguchi<sup>3</sup>,

3                   Kazunori Konishi<sup>4</sup>, Kai Kappert<sup>5,\*</sup>, Shigeru Nakano<sup>6,\*</sup>

4                   1) Department of Mathematics, Keio University, Kanagawa, Japan

5                   2) Department of Biochemistry, School of Pharmaceutical Sciences, Ohu University,  
6                   Koriyama, Fukushima, Japan

7                   3) Department of Biochemistry, Nihon University School of Dentistry, Tokyo, Japan

8                   4) Department of Diabetology and Endocrinology, Kanazawa Medical University School of  
9                   Medicine, Ishikawa, Japan

10                  5) Charité – Universitätsmedizin Berlin, corporate member of Freie Universität

11                  Berlin, Humboldt-Universität zu Berlin, and Berlin Institute of Health; Institute of Laboratory  
12                  Medicine, Clinical Chemistry and Pathobiochemistry; Center for Cardiovascular Research  
13                  (CCR), Germany

14                  6) Shika Clinic, Hakui, Ishikawa, Japan

15                  \*: contributed equally

16                  #: corresponding author: Tsuneto Yamauchi, Department of Mathematics, Keio University,  
17                  Kanagawa, Japan

18

19 **Abstract**

20 Diagnosis of a certain disease generally relies on definitions established by professional  
21 medical societies and comprise the patient's history, physical examination, and test  
22 results. These include physical compositions such as body mass index (BMI), and  
23 laboratory tests such as serum creatinine and albumin in urine samples. In general,  
24 laboratory tests are based on mathematical methods, e.g. defining critical values from the  
25 mean  $\pm k\sigma$  of a population, where  $k$  is a natural number and the standard deviation is  $\sigma$   
26 ("mean  $\pm k\sigma$ -method"). In most cases  $k$  is defined as 2, leading to reference ranges  
27 defining 95% of test results as normal. However, this method mostly depends on a normal  
28 distribution of values.

29 Here we applied a novel method ("SoFR-method") based on data sorting to define  
30 refraction points, which carry informative value as diagnostic criteria. Applying the  
31 SoFR-method, standard measures such as critical BMI-values are categorized by equal  
32 robustness as by the mean  $\pm k\sigma$ -method. However, the SoFR-method showed higher  
33 validity when analyzing non-normalized values such as creatinine and albumin, as well as  
34 hepatocyte growth factor (HGF) and hemoglobin in a novel Perioscreen assay in saliva of  
35 diabetic and non-diabetic patients.

36 Taken together, we defined a novel method based on data sorting of test results from  
37 patients to effectively define refraction points which might guide more accurately clinical  
38 diagnoses and define relevant thresholds.

## 39 Introduction

40 The determination of a pathophysiological condition or the diagnosis of a certain disease  
41 usually rely on definitions established by professional medical societies. These diagnostic  
42 criteria are based on the combination of patient's signs, symptoms, thus patient's history,  
43 and physical examination and test results [1, 2]. Test results are quantifiable and comprise  
44 measures such as body weight and body mass index (BMI) as well as laboratory tests such  
45 as serum creatinine and albumin in urine samples.

46 Deducing diagnostic value from laboratory test results depends on mathematical methods  
47 [3, 4]. These define – presumably – critical values from the mean  $\pm k\sigma$  of a healthy  
48 population, where  $k$  is a natural number and  $\sigma$  is the standard deviation. Depending on the  
49 rigorousness desired,  $k$  varies from 1 (epidemiological measures) to 3 (tumor markers and  
50 cardiac troponin), but often is 2 (most laboratory tests, such as transaminases, glucose,  
51 lactate dehydrogenase etc.), where the range within these thereby defined 95% is  
52 considered the reference range [5-7]. Indeed, the broadly used current practice defines this  
53 reference interval based on collected ~120 samples derived from healthy individuals in a  
54 population [3]. Despite uncertainties determining “healthy” in cohorts, values between the  
55 2.5<sup>th</sup> (almost equal to mean -  $2\sigma$ ) and 97.5<sup>th</sup> percentiles (almost equal to mean +  $2\sigma$ ) or the  
56 99<sup>th</sup> percentile (mean +  $3\sigma$ ) are used for the definition of a reference interval.

57 Recent mathematical attempts were undertaken to more specifically address  
58 population-based issues, in particular in populations with high percentage of various races  
59 and ethnicities, such as in the United States [8, 9]. When using large data basis, such as  
60 electronic health records [10], reference intervals are sharpened and display differences  
61 between demographics, which might have clinical impact including prognostic value.

62 Certainly, the reference range including the upper and lower reference limit guides  
63 clinicians to interpret test results, knowing that these 95% of values are found in healthy

64 individuals. Even though this method is broadly acceptable and accurate, in particular if the  
65 standard deviation is not very large compared to the mean, this method, however, largely  
66 depends on a normal distribution of values [7]. Thus, taken into account that e.g. laboratory  
67 tests display integral components for medical diagnoses and decisions in patients, the  
68 mean  $\pm k\sigma$  method is limited in case of non-normal distribution of quantified clinical data.  
69 While large data sets might be useful in more accurately accounting for individual patients'  
70 demographics [9, 10], they still rely on normal value distributions and follow rather strict  
71 mathematical paradigms, which are prone to overlook better and more clinical relevant  
72 refractions points displaying changes in physical conditions, and therefore are critical for  
73 individual diagnoses. Here we applied a novel method based on consecutive data sorting  
74 visualizing such refraction points. In particular, this novel method is applicable in case of  
75 non-normal distributed data and, in contrast to the mean  $\pm k\sigma$  method, is based on data  
76 sets containing healthy and diseased individuals.

## 77 **Methods**

### 78 **General demographics and routine examinations**

79 Data from n=803 patients were obtained in the Shika-Clinic, Ishikawa-prefecture, Japan,  
80 between September 2017 and March 2018. All patients enrolled in this study documented  
81 informed consent. N=400 patients were males, and n=403 patients were females. The age  
82 ranged from 27 to 92 (mean 67.64±10.22) years. In a subset of analyses for periodontitis  
83 screening, n=307 patients were enrolled. Of these, n=121 of were diagnosed with type 2  
84 diabetes and n=186 of included patients were non-diabetics.

85 All patients underwent routine clinical examinations, including determination of body weight  
86 and height. The body mass index (BMI) was calculated according to the following  
87 definition:  $BMI = \text{body weight (kg)} / \text{body height (m)}^2$ .

88 This study was approved by the Ethics Committee of the Ohu University (#194), and  
89 Nihon University School of Dentistry (#EP17D007-1) and the study was conducted in  
90 accordance with the Helsinki Declaration of 1975, as revised in 2013, and the ethical  
91 guidelines for epidemiology research of 2002, as revised in 2008 (Ministry of Health, Labor  
92 and Welfare, Japan).

93

### 94 **SoFR-Method**

95 Here, we define the method which will show the refraction points of the data. From the  
96 original data, we will sort it in ascending order. When displayed on a graph, it may be  
97 possible to find refracted points. This method for finding refraction points, we will call  
98 “SoFR-Method” (this is an abbreviation of “Sorting, Finding the Refraction Points”).

99

## 100 **Periodontitis screening**

101 Screening for periodontitis (“Perioscreen” [11]) was done in n=648 patients in saliva  
102 samples. Based on combinatory analyses with HGF levels, a final cohort of n=174 data  
103 points were used for analyses. Each patient was instructed to rinse with 3 ml of water in the  
104 mouth for 10 s. Afterwards, the samples were collected in a paper cup. Saliva occult blood  
105 test was carried out using a test paper strip assay [11]. Briefly, an anti-human hemoglobin  
106 monoclonal antibody with colloidal gold conjugate was immobilized on membranes as  
107 capture antibody, followed by adding of saliva specimen. Based on capillary movement  
108 and membrane chromatography, positive reaction results from complex binding and  
109 subsequent red-violet color reaction. The test strip was shortly placed into 1:4 diluted  
110 saliva. The immunocomplex was visualized after 5 minutes. The sensitivity of the assay  
111 was determined at  $\geq 2\mu\text{g/ml}$ . Results were classified as grades 0 to 5.

## 112 **Nephropathy screening**

113 From n=482 patients urine was taken to evaluate potential prevalence of nephropathy.  
114 Based on combinatory analyses with HGF levels, a final cohort of n=132 data points were  
115 used for analyses. Urinary albumin in spot urin was measured by immunonephelometry  
116 using a kit from NITTOBO MEDICAL CO., LTD. (Tokyo, Japan).

117 Serum and urinary Cr was measured using enzymatic assays (SEKISUI MEDICAL. CO.,  
118 LTD., Tokyo, Japan).

## 119 **Quantification of hepatocyte growth factor and hemoglobin in saliva**

120 Besides periodontitis screening, collected saliva (mouth rinse) samples were used for  
121 quantification of hepatocyte growth factor (HGF) and hemoglobin in n=318 and n=322  
122 patients, respectively. HGF concentration in rinse water samples was measured by using  
123 HGF ELISA kit (Quantikine human HGF immunoassay, R&D systems, Minneapolis, MN,

124 USA) according to the manufacturer's instructions.

125 The rinse water samples stored at  $-80^{\circ}\text{C}$  were thawed on ice and diluted (2.86 to 3 folds,  
126 depending on the residual volume of each sample) with distilled water. Hemoglobin (Hb)  
127 concentration in rinsed water was measured using a commercially available kit for latex  
128 agglutination turbidimetry (LZ test - Eiken HbAo, Eiken Chemical Co., Tokyo, Japan)  
129 according to the manufacturer's instructions. In this system, Hb measurement in saliva  
130 should be performed after diluting saliva with a specific buffer solution which stabilizes the  
131 Hb before measurement. However, in the present study, the samples were originally  
132 diluted and the specific buffer solution was not employed.

### 133 **Statistics**

134 All data points were sorted ascendingly by its magnitude. After sorting the data, the points  
135 where the trends of the sorted data were visually changed with regard to its direction, we  
136 will call these points "refraction points."

137 On the other hand, the "Inflection point" is mathematically defined. This is defined as the  
138 zero points of the second derivative of a smooth curve. In the case of the normal  
139 distribution, there are two inflection points which are  $\pm 1 \times \sigma$  away from the mean (where  $\sigma$   
140 is the standard deviation of the normal distribution).

141 Further, for testing the normality of data, Shapiro-Wilk normality test was applied. In the  
142 Shapiro-Wilk normality test, the null-hypothesis is the data are come from a normally  
143 distributed population. If the p-value is less than chosen level of significance, then the  
144 null-hypothesis is rejected. On the other hand, if the p-value is greater than the chosen  
145 level of significance, we can't refuse the null-hypothesis. In the case of the level of  
146 significance 0.05, if p-value  $>0.05$ , then the null-hypothesis can't be rejected.

147 In this paper, for numerical analyses and graph drawing, the statistical software "R" was  
148 used.

## 149 **Results**

150 In this part, we explain four examples of using the SoFR method. The Shika-Clinic data  
151 was collected for the research of the relationship between dental health and diabetes. We  
152 study two cohorts; diabetic patients and non-diabetic patients. We study these two cohorts  
153 in terms of the HGF and Hemoglobin in saliva.

154 We are also searching the reference intervals of the values of the HGF and Hemoglobin in  
155 saliva. It is very hard to find the thresholds, but the first two examples show that SoFR  
156 method will suggest several candidates of the thresholds.

157 The last two examples are the simple applications of the SoFR method to  
158 albumin-to-creatinine ratio (ACR) and BMI (Body Mass Index).

159

### 160 **Hepatocyte Growth Factor in saliva**

161 Using the Perioscreen assay [11], we analyzed both hemoglobin and HGF concentration in  
162 saliva collected in patients, separated into cohorts of diabetics and non-diabetics. As  
163 shown in Figure 1A, HGF was determined within a range of 26.4 pg/ml and 13574.1 pg/ml,  
164 with large variation and significant differences between the 2 cohorts. (Fig 1A)

165 While in non-diabetic patients the visualized refraction point was determined at 2500 pg/ml,  
166 diabetics were characterized by a refraction point of 1500 pg/ml. Next we dichotomized  
167 each cohort into two subsets of patients:

168 HGF levels < 1500 pg/ml (subset A) and HGF levels  $\geq$  1500 pg/ml (subset B),

169 HGF levels < 2500 pg/ml (subset C) and HGF levels  $\geq$  2500 pg/ml (subset D)

170 (Table 1).



171 As for the HGF example, we introduced another medical characteristic, which is the  
172 Perioscreen level at the following definition: Perioscreen  $\leq 2$  representing good oral  
173 condition and Perioscreen  $\geq 3$  defining bad oral condition. In diabetics only 15.4% were  
174 characterized at good oral condition with simultaneously HGF levels  $\geq 1500$  pg/ml, while  
175 the vast majority with enhanced HGF levels displayed a Perioscreen level  $\geq 3$ . Strikingly,  
176 almost the equivalent proportion of a Perioscreen value, separated at  $\leq 2$  and  $\geq 3$ , was  
177 seen in non-diabetics when their cohort-specific refraction point of 2500 pg/ml of HGF was  
178 applied.

179 As shown in Figure 1B, the QQ-plots demonstrate lack of normal distribution of this data  
180 set, which refuses the necessity to apply distribution functions or applying the mean  $\pm k \times \sigma$   
181 method. (Fig 1B-1 and 1B-2)

182

### 183 **Hemoglobin in saliva**

184 We further examined hemoglobin concentration in saliva specimen.

185 Following, we sorted the data and colored values from the Perioscreen assay are shown in  
186 Figure 2B. We detected different refraction points for both analyzed cohorts. (Fig 2A)

187 While we observed a refraction point at 2.0  $\mu\text{g/ml}$  for diabetics, there were two refraction  
188 points at higher values for non-diabetic patients, at 4.0  $\mu\text{g/ml}$  and 7.0  $\mu\text{g/ml}$ , which might  
189 reflect distinct pathophysiological changes for this study group. Therefore, we  
190 dichotomized each cohort into two subsets of patients:

191 hemoglobin values  $< 2.0$   $\mu\text{g/ml}$  (subset A) and  $\geq 2.0$   $\mu\text{g/ml}$  (subset B) for diabetics,

192 hemoglobin values  $< 4.0$   $\mu\text{g/ml}$  (subset C) and  $\geq 4.0$   $\mu\text{g/ml}$  (subset D) for non-diabetics.

193 As for the HGF analyses, we introduced the Perioscreen level as another medical  
194 characteristic, following the definition Perioscreen  $\leq 2$  representing good oral condition and

195 Perioscreen  $\geq 3$  defining bad oral condition. Table 2 shows that among diabetics the vast  
196 majority with hemoglobin values above 2.0  $\mu\text{g/ml}$  displayed Perioscreen levels  $\geq 3$  (88.9%)  
197 and, thus, were characterized by bad oral conditions. Non-diabetics, when separated into  
198 subsets at the significantly lower hemoglobin value of 4.0  $\mu\text{g/ml}$ , also the highest  
199 proportion of patients displaying a Perioscreen level  $\geq 3$  were found in the group of higher  
200 hemoglobin concentration in saliva (94.3%). (Table 2)

201 As shown in Figure 2B, the QQ-plots demonstrate lack of normal distribution of this data  
202 set, which refuses the necessity to apply distribution functions or applying the mean  $\pm k \times \sigma$   
203 method. (Fig 2B-1 and 2B-2)

204

#### 205 **Albumin-to-creatinine ratio in urine**

206 Next we applied the SoFR in another data of the Shika-Clinic, including evaluation of urine  
207 albumin-to-creatinine ratio (ACR), well-established to detect early kidney disease in  
208 diabetic patients or patients at high risk for development of renal insufficiency like  
209 hypertensives [13].

210 The original data contains samples with values of 1556.60. It is not an outlier, but we would  
211 like to ignore this sample for research purposes. As shown in Figure 3A, a refraction point  
212 of ACR was visualized at 30mg/g creatinine for n=123 samples when data were evaluated  
213 where HGF-screening was performed. (Fig 3A)

214 We further separated the data at a refraction point  $\alpha$  with "A" being the subset of data with  
215 values  $< \alpha$  and "B" as the complementary data set of "A" with values  $> \alpha$ . In the case of  
216 ACR,  $\alpha$  is 30.0 mg/g creatinine with "A" as the subset of patients characterized by  
217 ACR-values  $< \alpha$  ( $< 30.0$  mg/g creatinine). "B" is the subset of patients with ACR-values  $\geq$   
218 30.0 mg/g creatinine. By introducing another medical characteristic, such as nephropathy,

219 we show that the number of patients with nephropathy in “B” is much greater than in “A”,  
220 underlining the usefulness of the SoFR-method.

221 In contrast, applying the "mean  $\pm \sigma$  method", the mean of creatinine data of the  
222 Shika-Clinic was calculated to 24.32 mg/g creatinine,  $1\sigma$  to 45.76 mg/g creatinine and thus  
223 "mean +  $1\sigma$ " equaled 70.08 mg/g creatinine. Moreover, for the minus part of "mean  $\pm \sigma$   
224 method", we will get minus value (-21.44), it is not acceptable. As visualized in Figure 2A,  
225 there is no evidence for a refraction point at the mean +  $1\sigma$  value, suggesting inferiority of  
226 the “mean  $\pm 1\sigma$  method” compared to the SoFR-method.

227 Figure 2B shows the QQ-plot of the ACR data. Apparently, ACR data are not normally  
228 distributed. (Fig 3B)

229

### 230 **Body weight and Body Mass Index**

231 Body weight was measured in all 694 patients and the BMI was calculated. Lowest BMI  
232 was 15.5 and highest BMI was 43.2. Thereafter, data was sorted by the BMI values in  
233 ascending order, depicted in Figure 4A, showing sigmoidal shape of the data and two  
234 refraction points at 20 and 30. In Figure 4A also the calculated mean  $\pm 1 \times \sigma$  (red lines) and  
235 BMI=20 and 30 (blue lines) are visualized. According to classifications by the WHO normal  
236 weight considered in the range of 18.5 to  $< 25$  and obesity at values  $\geq 30$  [12], thus at the  
237 same value as we determined the second refraction point after data sorting. (Fig 4A)

238 We next performed Quantil-Quantil (QQ) plots of BMI values for quantile points of normal  
239 distribution and quantile point of samples (Figure 4B). The graph visualizes data  
240 distribution and shows the degree of the normality of BMI data. However, it is difficult to  
241 justify the normality from this graph. (Fig 4B)

242 Using the Shapiro-Wilk normality test the p-value of  $4.18 \times 10^{-12} < 0.05$  was calculated.  
243 Thus, this test shows that the BMI data does not follow a normal distribution. Thus, SoFR,  
244 which is based on visual recognition of refraction points, is superior to the argument  
245 assuming the normal distribution.

246

## 247 **Discussion**

248 Here we demonstrate that the SoFR-method, based on plotting data in study groups or  
249 cohorts, is useful to define refraction points, which can be used for thresholds in clinical  
250 settings. We show applicability the SoFR- method in case of non-normal distributed data  
251 for 4 different conditions: BMI, ACR, and both hemoglobin and HGF in saliva. Thus, the  
252 SoFR-method might be useful for professional clinical assessment or referring third data,  
253 evaluating the patient's physical condition.

254 While diagnosis of pathophysiological conditions conventionally relies on established  
255 definitions, data of quantifiable conditions are not always normally distributed among  
256 cohorts or study groups [14, 15]. Since the mean  $\pm k\sigma$  method shows limitations in case of  
257 non-normal distribution of quantified data sets, here we established a novel method to  
258 define refraction points, visualizing changes in clinical conditions. This SoFR-method is  
259 potentially useful to establish cut-off values beyond the established mean  $\pm k\sigma$  method.

260 Sorting BMI data in ascending order and visualizing refraction points from a cohort of 694  
261 patients enrolled in this study, we observed a sigmoidal shape of the data with refraction  
262 points at 20 and 30 kg/m<sup>2</sup>. Importantly, also the WHO defines obesity at 30 kg/m<sup>2</sup> for adults  
263 [16], which underlines the validity our sorted data. However, it has to noted that in contrast  
264 to e.g. clinical-chemistry data from blood samples, the WHO definition is not extracted from  
265 the normal healthy population, but was rather defined in terms of recommended values,  
266 easily to be communicated from clinicians to their patients [12].

267 As for BMI, ACR values were also not normally distributed among our cohort. Nonetheless,  
268 by sorting the data in ascending order we detected a refraction point at ACR30, which,  
269 strikingly, represents also the cut-off used in clinical diagnostic practice [17, 18]. This  
270 clearly shows that our SoFR-method is not susceptible to mathematical conditions such as  
271 normal-distribution, in contrast to the mean  $\pm k\sigma$  method.

272 Further, here we analyzed the clinical data of a novel assay to screen for periodontitis  
273 disease: Perioscreen [11, 19]. We determined hemoglobin and HGF as parameters in  
274 saliva and sorted our data with regard to Perioscreen values in patients divided into  
275 diabetics and non-diabetics based on the significance of HGF for development of  
276 periodontitis [20, 21]. Regarding HGF, the SoFR-method strongly argues for the  
277 usefulness of defining refraction points by plotting and visualizing data, since we observed  
278 refraction points, which differed in magnitude between diabetics and non-diabetics.  
279 Moreover, since we introduced the clinical entity of oral condition (Perioscreen value) we  
280 observed differences in refraction points between the study groups which could be taken  
281 into account for applying cut-off values for individual patients. This suggests that  
282 susceptibility to periodontitis in diabetic patients might be triggered by HGF and also  
283 depends on differences in HGF values. Our data on HGF were supported by the finding  
284 that also significant differences of hemoglobin values were detected between diabetics and  
285 non-diabetics. Here we also demonstrate specific refraction points, which might be able to  
286 serve as thresholds for periodontitis.

287 To summarize, our SoFR-method might add to clinical algorithms in defined study cohorts,  
288 since laboratory tests and clinical examination of patients display integral components for  
289 medical diagnoses and/or decisions in patients. In particular, data sets from which  
290 decisions are deduced for individual patients frequently rely on normal value distributions  
291 and depend on a healthy cohort as a reference. While the classical  $\text{mean} \pm 1\sigma$  method  
292 follows the assumption of normal-distribution and thus represents a strict mathematical  
293 function, the SoFR-method carries the potential to overcome these limitations in case of  
294 non-normal distributed data. Further, cut-off values might be extracted for defined cohorts  
295 and diseases, such as periodontitis, and in case of adding another clinical entity to  
296 assessment, such as diabetes.

297

## 298 **Conclusion**

299 While the SoFR-method might represent an alternative way to find the threshold for  
300 diagnosis, the mean  $\pm k \times \sigma$  method is well established in diagnostic settings and for  
301 definitions of cut-off values deduced from large cohorts of healthy individuals. However,  
302 our simple SoFR-method, which can be applied in mixed cohorts with healthy and  
303 diseased individuals, might provide good references for suggesting refraction/changing  
304 points of the physical status, also for individual patients within a defined race- or  
305 disease-defined cohort.

306

## 307 **Author Contributions**

| <b>Contributor Role</b>                     | <b>Contributor</b>       |
|---------------------------------------------|--------------------------|
| <b>Conceptualization</b>                    | TY                       |
| <b>Data Curation</b>                        | TY                       |
| <b>Formal Analysis</b>                      | TY                       |
| <b>Funding Acquisition</b>                  | SN, MO, YY               |
| <b>Investigation</b>                        | MO                       |
| <b>Methodology</b>                          | TY                       |
| <b>Project Administration</b>               | MO                       |
| <b>Resources</b>                            | SN, KKo                  |
| <b>Software</b>                             | TY                       |
| <b>Supervision</b>                          | MO, SN, KKa              |
| <b>Validation</b>                           | SN, MO, YY, KKo, KKa     |
| <b>Visualization</b>                        | TY                       |
| <b>Writing – Original Draft Preparation</b> | TY, SN, KKa              |
| <b>Writing – Review &amp; Editing</b>       | TY, SN, MO, YY, KKo, KKa |





## 309   **References**

- 310   1.   Keiffer MR. Utilization of clinical practice guidelines: barriers and facilitators. *Nurs Clin*  
311       North Am. 2015;50(2):327-45.
- 312   2.   Greenfield S. Clinical Practice Guidelines: Expanded Use and Misuse. *JAMA*.  
313       2017;317(6):594-5.
- 314   3.   Reed AH, Henry RJ, Mason WB. Influence of statistical method used on the resulting  
315       estimate of normal range. *Clin Chem*. 1971;17(4):275-84.
- 316   4.   Mohammad F, Theisen-Toupal JC, Arnaout R. Advantages and limitations of  
317       anticipating laboratory test results from regression- and tree-based rules derived from  
318       electronic health-record data. *PLoS One*. 2014;9(4):e92199.
- 319   5.   Greiser A, Winter T, Mahfoud H, Kallner A, Ittermann T, Masuch A, et al. The 99th  
320       percentile and imprecision of point-of-care cardiac troponin I in comparison to central  
321       laboratory tests in a large reference population. *Clin Biochem*. 2017;50(18):1198-202.
- 322   6.   Qi Z, Zhang L, Chen Y, Ma X, Gao X, Du J, et al. Biological variations of seven tumor  
323       markers. *Clin Chim Acta*. 2015;450:233-6.
- 324   7.   Horn PS, Pesce AJ, Copeland BE. A robust approach to reference interval estimation  
325       and evaluation. *Clin Chem*. 1998;44(3):622-31.
- 326   8.   Juraschek SP, Coresh J, Inker LA, Levey AS, Kottgen A, Foster MC, et al.  
327       Comparison of serum concentrations of beta-trace protein, beta2-microglobulin,  
328       cystatin C, and creatinine in the US population. *Clin J Am Soc Nephrol*.  
329       2013;8(4):584-92.
- 330   9.   Groesbeck D, Kottgen A, Parekh R, Selvin E, Schwartz GJ, Coresh J, et al. Age,  
331       gender, and race effects on cystatin C levels in US adolescents. *Clin J Am Soc*  
332       *Nephrol*. 2008;3(6):1777-85.
- 333   10. Hoffmann TJ, Ehret GB, Nandakumar P, Ranatunga D, Schaefer C, Kwok PY, et al.  
334       Genome-wide association analyses using electronic health records identify new loci  
335       influencing blood pressure variation. *Nat Genet*. 2017;49(1):54-64.
- 336   11. Ohshima M, Zhu L, Yamaguchi Y, Kikuchi M, Nakajima I, Langham CS, et al.  
337       Comparison of periodontal health status and oral health behavior between Japanese  
338       and Chinese dental students. *J Oral Sci*. 2009;51(2):275-81.
- 339   12. Gallagher D, Heymsfield SB, Heo M, Jebb SA, Murgatroyd PR, Sakamoto Y. Healthy  
340       percentage body fat ranges: an approach for developing guidelines based on body  
341       mass index. *Am J Clin Nutr*. 2000;72(3):694-701.
- 342   13. Peralta CA, Frigaard M, Rubinsky AD, Rolon L, Lo L, Voora S, et al. Implementation of  
343       a pragmatic randomized trial of screening for chronic kidney disease to improve care  
344       among non-diabetic hypertensive veterans. *BMC Nephrol*. 2017;18(1):132.
- 345   14. Martinez-Cambor P. Fully non-parametric receiver operating characteristic curve  
346       estimation for random-effects meta-analysis. *Stat Methods Med Res*. 2017;26(1):5-20.

- 347 15. Kara K, Mahabadi AA, Geisel MH, Lehmann N, Kalsch H, Bauer M, et al. B-type  
348 natriuretic peptide: distribution in the general population and the association with major  
349 cardiovascular and coronary events--the Heinz Nixdorf Recall Study. *Clin Res Cardiol.*  
350 2014;103(2):125-32.
- 351 16. Flegal KM, Kit BK, Graubard BI. Body mass index categories in observational studies  
352 of weight and risk of death. *Am J Epidemiol.* 2014;180(3):288-96.
- 353 17. Inomat S, Haneda M, Moriya T, Katayama S, Iwamoto Y, Sakai H, et al. [Revised  
354 criteria for the early diagnosis of diabetic nephropathy]. *Nihon Jinzo Gakkai Shi.*  
355 2005;47(7):767-9.
- 356 18. Murphy D, McCulloch CE, Lin F, Banerjee T, Bragg-Gresham JL, Eberhardt MS, et al.  
357 Trends in Prevalence of Chronic Kidney Disease in the United States. *Ann Intern Med.*  
358 2016;165(7):473-81.
- 359 19. Reed SG, Manz MC, Snipe SM, Ohshima M, Wagner CL. Feasibility study of a  
360 salivary occult blood test to correlate with periodontal measures as indicators of  
361 periodontal inflammation in a population of pregnant women. *J Oral Sci.*  
362 2015;57(1):55-8.
- 363 20. Ohshima M, Sakai A, Ito K, Otsuka K. Hepatocyte growth factor (HGF) in periodontal  
364 disease: detection of HGF in gingival crevicular fluid. *J Periodontal Res.*  
365 2002;37(1):8-14.
- 366 21. Ohshima M, Fujikawa K, Akutagawa H, Kato T, Ito K, Otsuka K. Hepatocyte growth  
367 factor in saliva: a possible marker for periodontal disease status. *J Oral Sci.*  
368 2002;44(1):35-9.

369

### 370 **Acknowledgements**

371 We thank Eiki Matsushita (Hakui General Hospital), Toshihiro Tamura (Tamura Eye Clinic),  
372 Tateura Hidemaru (Tateura Dental Clinic), and Naoki Nishida (Naoki Dental Clinic),  
373 members of Multi-institutional Collaborative Study in Hakui for their special cooperation.

374 We also thank Masaaki Eto (Ohu University) for his helpful advices.

375 This study was supported in part by a grant from the Dental Research Center, Nihon  
376 University School of Dentistry (2017, 2018), and by a Shika Town Health Promotion Fund,  
377 and also supported in part by a grant from Oriental Life Insurance Cultural Development  
378 Center.

379

### 380 **Conflict of interest**

381 The authors declare no conflicts of interest in this study.

382

383

384 **Table 1: HGF values and Perioscreen**

385 **Diabetics**

|                            | Perioscreen level $\leq 2$ | Perioscreen level $\geq 3$ | Perioscreen level $\leq 2$ | Perioscreen level $\geq 3$ |
|----------------------------|----------------------------|----------------------------|----------------------------|----------------------------|
| Subset A (HGF < 1500)      | 21/38                      | 17/38                      | 55.3%                      | 44.7%                      |
| Subset B (HGF $\geq$ 1500) | 4/26                       | 22/26                      | 15.4%                      | 84.6%                      |

386

387 **Non-diabetics**

|                            | Perioscreen level $\leq 2$ | Perioscreen level $\geq 3$ | Perioscreen level $\leq 2$ | Perioscreen level $\geq 3$ |
|----------------------------|----------------------------|----------------------------|----------------------------|----------------------------|
| Subset A (HGF < 2500)      | 54/92                      | 38/92                      | 58.7%                      | 41.3%                      |
| Subset B (HGF $\geq$ 2500) | 4/18                       | 14/18                      | 22.2%                      | 77.8%                      |

388

389

390 **Table 2: hemoglobin values and Perioscreen**

391 **Diabetics**

|                         | Perioscreen level $\leq 2$ | Perioscreen level $\geq 3$ | Perioscreen level $\leq 2$ | Perioscreen level $\geq 3$ |
|-------------------------|----------------------------|----------------------------|----------------------------|----------------------------|
| Subset A (hem. < 2)     | 22/37                      | 15/37                      | 59.5%                      | 40.5%                      |
| Subset B (hem $\geq$ 2) | 3/27                       | 24/27                      | 11.1%                      | 88.9%                      |

392

393 **Non-diabetics**

|                         | Perioscreen level $\leq 2$ | Perioscreen level $\geq 3$ | Perioscreen level $\leq 2$ | Perioscreen level $\geq 3$ |
|-------------------------|----------------------------|----------------------------|----------------------------|----------------------------|
| Subset A (hem < 4)      | 56/75                      | 19/75                      | 74.7%                      | 25.3%                      |
| Subset B (hem $\geq$ 4) | 2/35                       | 33/35                      | 5.7%                       | 94.3%                      |

394

395

396 Fig 1 A : HGF with Perioscreen

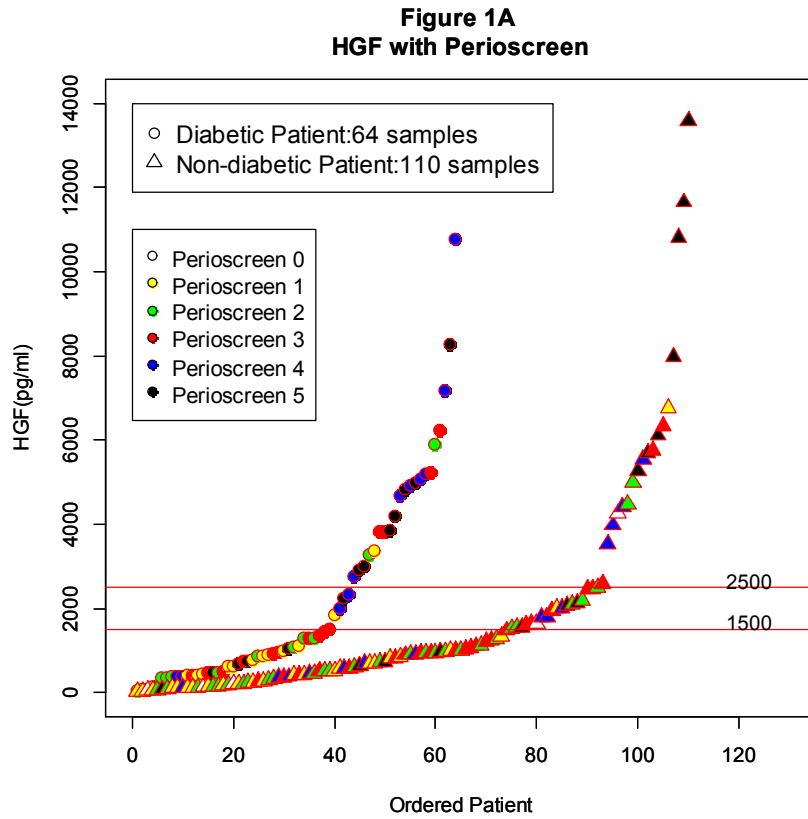

397

398

399 Fig 1 B : QQ-plot, HGF values

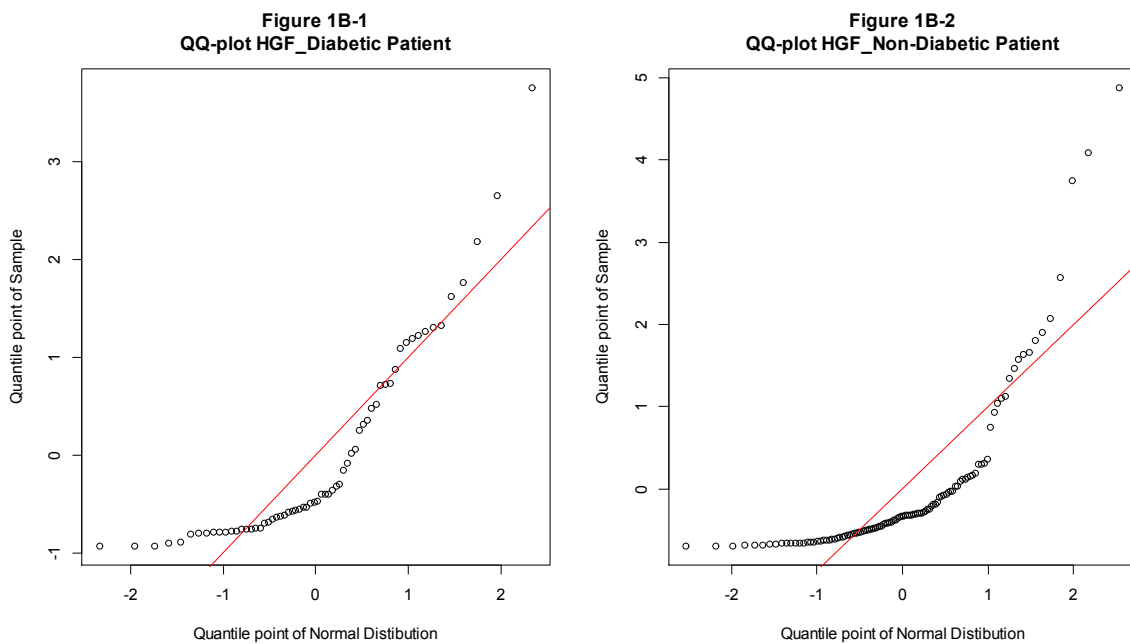

400

401

402

403 Fig 2 A : Hemoglobin with Perioscreen

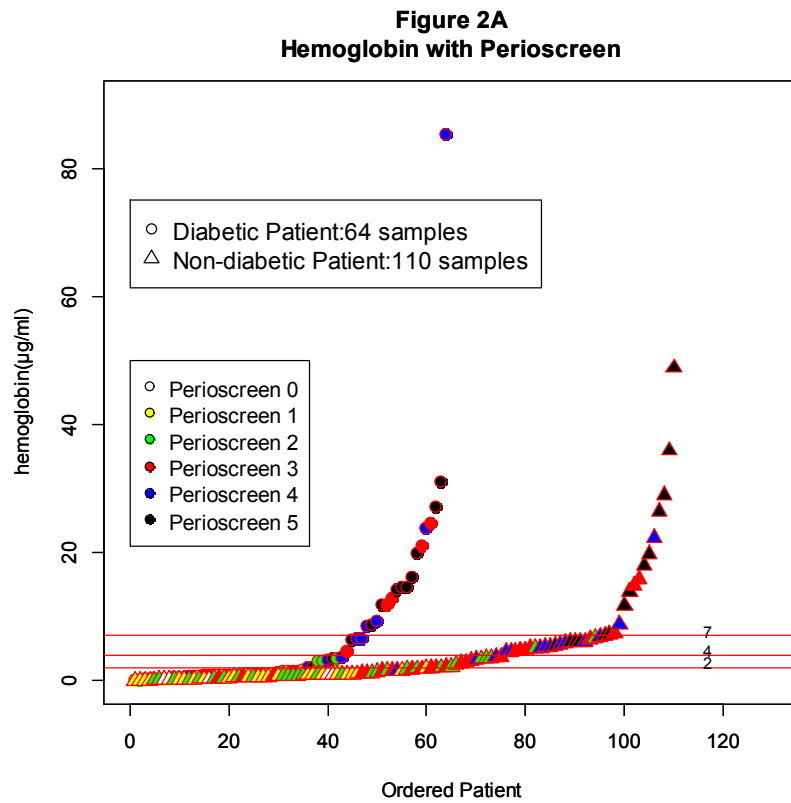

404

405 Fig 2 B : QQ-plot, Hemoglobin values

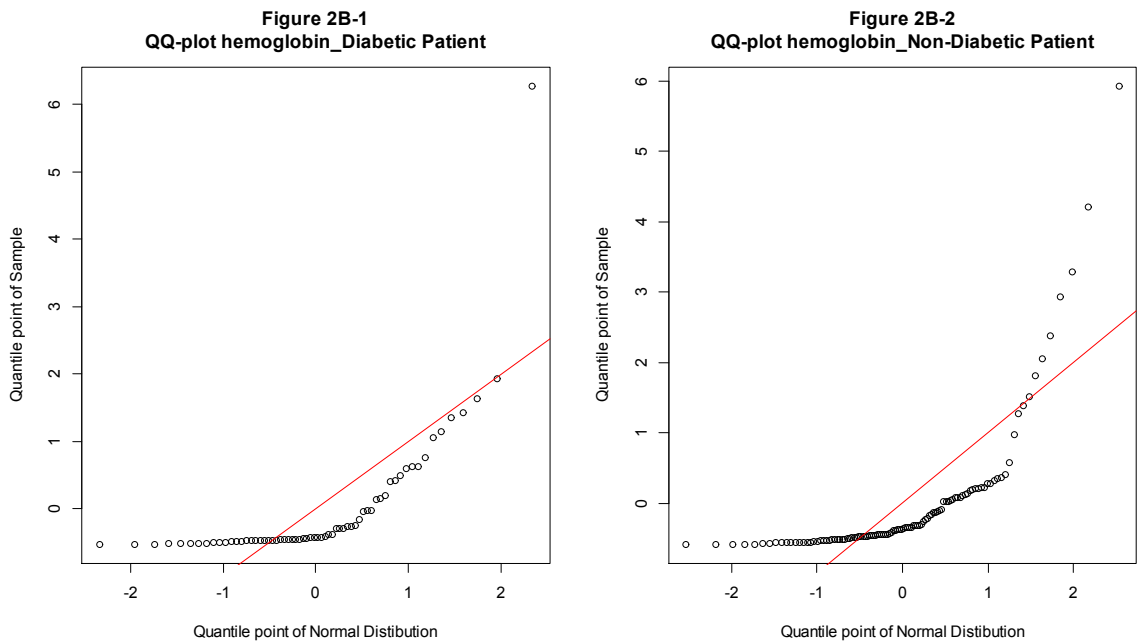

406

407

408

409 Fig 3 A : ACR (Diabetic Patients)

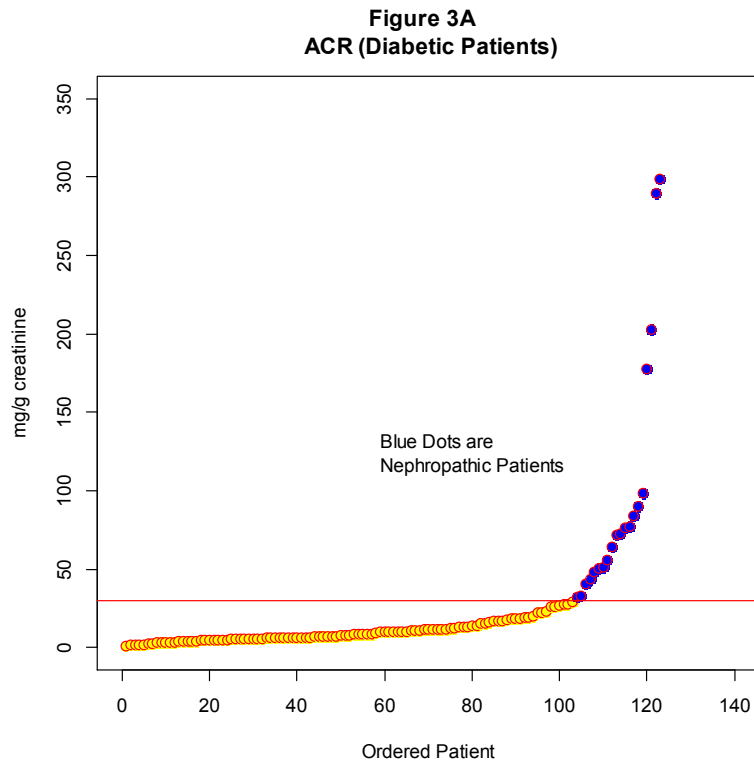

410

411 Fig 3 B : QQ-plot, ACR values

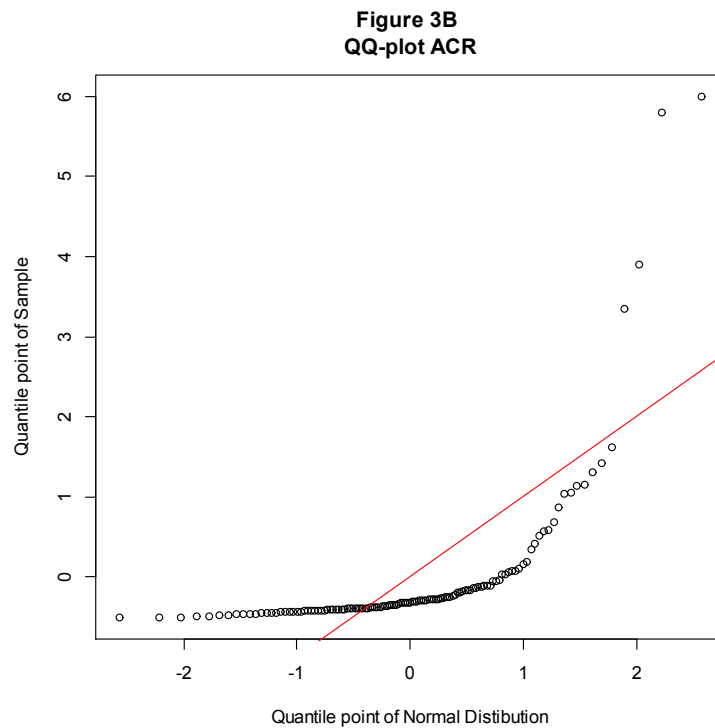

412

413 Fig 4 A : BMI

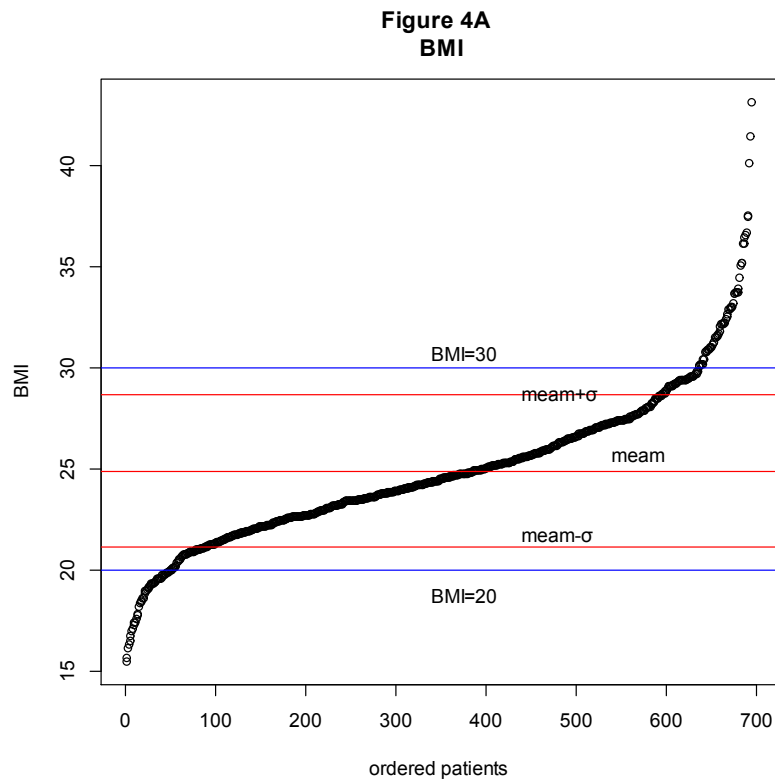

414

415 Fig 4 B : QQ-plot, BMI values

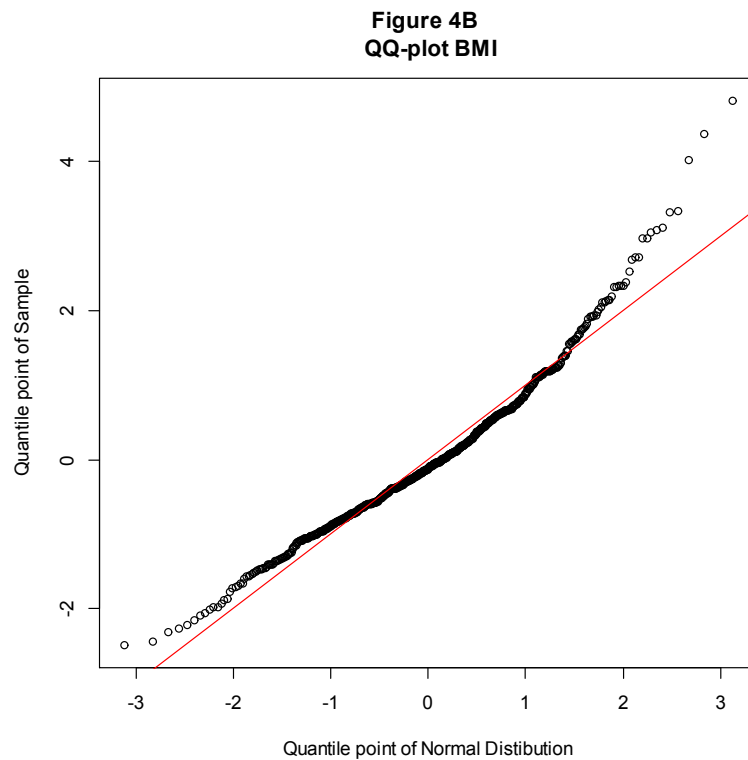

416

417 **Figure legends**

418 **Figure 1A. HGF with Perioscreen**

419 It is the graph which showed the measurement of HGF and the relation of the value of a  
420 perioscreen. When the HGF measurement values are sorted in ascending order, divided  
421 into diabetic patients and non-diabetic patients, it is visually shown that the value of  
422 Perioscreen remarkably increases as the HGF value increases. Furthermore, it can be  
423 seen that the location of the refraction points of HGF differ between diabetic and  
424 non-diabetic patients, which is another new question.

425 **Figure 1B-1 and 1B-2. QQ plots HGF**

426 QQ plots were generated to check whether HGF values follow normal distribution for  
427 diabetic and non-diabetic patients. In any case, normality is denied, and visual judgment is  
428 considered to be superior to forcibly creating a reference interval with an mean  $\pm k\sigma$ .

429 **Figure 2A. hemoglobin with Perioscreen**

430 The same analysis as HGF was carried out for the relationship between hemoglobin value  
431 and perioscreen. Again, the refraction points differ between diabetic and non-diabetic  
432 patients.

433 Moreover, it can be visually observed that the value of the Perioscreen increases as the  
434 hemoglobin value increases.

435 **Figure 2B-1 and 2B-2. QQ plots hemoglobin**

436 QQ plots were generated to check whether hemoglobin values follow normal distribution  
437 for diabetic and non-diabetic patients. In any case, normality is denied, and visual  
438 judgment is considered to be superior to forcibly creating a reference interval with an mean  
439  $\pm k\sigma$ .

440 **Figure 3A. ACR (Diabetic Patients)**

441 It is the graph which arranged the ACR of a diabetic patient in order of size, and looked at  
442 the refraction point. There is a change point around 30 mg/ml, at this point it is possible to



443 distinguish whether or not the patient is nephropathy even in actual diagnosis.

444 **Figure 3B. QQ-plot ACR**

445 It was checked by QQ plot whether ACR value is normally distributed. It can not be said  
446 that it is a normal distribution.

447 **Figure 4A. BMI**

448 The Shika-Clinic data contains 694 patients' BMI data. This is a graph in which BMI data  
449 are arranged in order of size and the refraction points are seen.

450 **Figure 4B. QQ-plot of BMI**

451 QQ plots were generated to ensure that the BMI data followed the normal distribution.  
452 According to this, the central part shows a good fit to the normal distribution, but not the fit  
453 at both ends. Therefore, Shapiro-Wilk normality test was performed, the result is that  
454 normality is denied.

455

456
